# Supplementary material for: Predicting how and when hidden neurons skew measured synaptic interactions
Source: PubMed Central journal article supplement (PMC6219819; doi:10.1371/journal.pcbi.1006490), 2018-10-22
Supplement: pcbi.1006490.s004.pdf [file pcbi.1006490.s004.pdf]

**Table S1.** Network activity simulation parameter values.

|                                                  |                               |
|--------------------------------------------------|-------------------------------|
| Network connectivity parameters                  | See Table 1.                  |
| Alpha function decay time $\tau \equiv 1/\alpha$ | 10                            |
| Time bin width $\Delta t$                        | $0.01\tau$                    |
| Transient time window                            | $5\tau$                       |
| Simulation stopping time                         | $4000\tau + \text{transient}$ |
